# Supplementary material
Source: PubMed Central journal article supplement (PMC7544937)
Supplement: TBSD_A_1819881_SM8033.pdf [file TBSD_A_1819881_SM8033.pdf]

Supplementary Table S1 | Amino acid substitutions of spike protein of hundred isolates.

| Position | Amino acid replaced | GenBank Definition                                                                                           | GenBank ID |
|----------|---------------------|--------------------------------------------------------------------------------------------------------------|------------|
| 28       | AY(N)T              | Severe acute respiratory syndrome coronavirus 2 isolate SARS-CoV-2/Yunnan-01/human/2020/CHN, complete genome | MT049951.1 |
| 49       | LH(Y)S              | Severe acute respiratory syndrome coronavirus 2 isolate 2019-nCoV/USA-CA5/2020, complete genome              | MT027064.1 |
| 157      | EL(F)R              | Severe acute respiratory syndrome coronavirus 2 isolate 2019-nCoV/USA-CruiseA-18/2020, complete genome       | MT159716.1 |
| 181      | EV(G)K              | Severe acute respiratory syndrome coronavirus 2 isolate 2019-nCoV/USA-CruiseA-23/2020, complete genome       | MT184910.1 |
| 221      | FW(S)A              | Severe acute respiratory syndrome coronavirus 2 isolate SNU01, complete genome                               | MT039890.1 |
| 247      | RR(S)Y              | Severe acute respiratory syndrome coronavirus 2 isolate Australia/VIC01/2020, complete genome                | MT007544.1 |
| 407      | VI(R)Q              | Severe acute respiratory syndrome coronavirus 2 isolate SARS-CoV-2/29/human/2020/IND, complete genome        | MT012098.1 |
| 614      | QG(D)V              | Severe acute respiratory syndrome coronavirus 2 isolate SARS-CoV-2/PC00101P/human/2020/USA, complete genome  | MT192765.1 |
| 930      | SV(A)I              | Severe acute respiratory syndrome coronavirus 2 isolate SARS-CoV-2/166/human/2020/IND, complete genome       | MT050493.1 |

Multiple sequence alignment were performed to identify the homology of spike protein with in the hundred isolates. Results revealed that there were nine amino acid substitutions with in the spike protein sequence of hundred isolates. Red colour residue indicates the substituted amino acid in place of the residue shown in brackets.

Supplementary Table S2 | Amino acid substitutions of main protease of hundred isolates.

| <b>Position</b> | <b>Amino acid replaced</b> | <b>GenBank Definition</b>                                                                                      | <b>GenBank ID</b> |
|-----------------|----------------------------|----------------------------------------------------------------------------------------------------------------|-------------------|
| <b>74</b>       | PX(S)G                     | Severe acute respiratory syndrome coronavirus 2 isolate 2019-nCoV/USA-CruiseA-24/2020, complete genome         | MT184911.1        |
| <b>124</b>      | IC(R)K                     | Severe acute respiratory syndrome coronavirus 2 isolate SARS-CoV-2/nCoV-19-02S/human/2020/VNM, complete genome | MT192773.1        |

Multiple sequence alignment were performed to identify the homology of main protease with in the hundred isolates. Results revealed that there were only two amino acid substitutions with in the main protease sequence of hundred isolates. Red colour residue indicates the substituted amino acid in place of the residue shown in brackets.

Supplementary Table S3 | Docking score and binding site residues of TMPRSS2 against 16 protease inhibitors.

| <b>Target</b> | <b>Ligand</b>                | <b>LibDock Score</b> | <b>Active site residues interacted through H-bond</b> |
|---------------|------------------------------|----------------------|-------------------------------------------------------|
|               | Ritonavir (CID_392622)       | 195.831              | HIS296, SER441                                        |
|               | Atazanavir (CID_148192)      | 185.41               | HIS296, SER441                                        |
|               | Indinavir (CID_5362440)      | 178.747              | SER441, ASP435                                        |
|               | Lopinavir (CID_92727)        | 177.819              | SER441                                                |
|               | Darunavir(CID_213039)        | 177.313              | SER441                                                |
|               | Saquinavir(CID_441243)       | 170.439              | SER441                                                |
|               | Tipranavir(CID_54682461)     | 168.931              | -                                                     |
| <b>TMRSS2</b> | Nelfinavir(CID_64143)        | 163.876              | HIS296                                                |
|               | Amprenavir(CID_65016)        | 160.613              | HIS296, SER441, ASP435                                |
|               | Fosamprenavir(CID_131536)    | 159.957              | SER441                                                |
|               | Paritaprevir*( CID_45110509) | 153.917              | HIS296, SER441                                        |
|               | Simeprevir* (CID_24873435)   | 151.171              | SER441, ASP435                                        |
|               | Boceprevir * (CID_10324367)  | 99.9736              | SER441                                                |
|               | Asunaprevir*( CID_16076883)  | 71.993               | SER441                                                |
|               | Grazoprevir* (CID_44603531)  | No pose              | -                                                     |
|               | Telaprevir*( CID_3010818)    | No pose              | -                                                     |

Molecular docking studies were done using LibDock protocol in Discovery studio 4.1 and the pose having highest docking score corresponding to each ligand is documented for further analysis. Study revealed that Ritonavir showed highest docking score and favorable interactions with amino acid residues in defined active site. \* indicate HCV inhibitors.

Supplementary Table S4 | Docking score and binding site residues of Cathepsin L against 16 protease inhibitors.

| <b>Target</b>      | <b>Ligand</b>                | <b>LibDock Score</b> | <b>Active site residues interacted through H-bond</b> |
|--------------------|------------------------------|----------------------|-------------------------------------------------------|
|                    | Atazanavir (CID_148192)      | 166.186              | ASP162, GLY68, MET70, MET161, HIS163, GLY67, LEU69    |
|                    | Ritonavir (CID_392622)       | 158.542              | ASP162, GLN19, GLY68, MET161, TRP26, GLY23, GLY67     |
|                    | Indinavir (CID_5362440)      | 157.285              | ASP162, GLN19, GLY68                                  |
|                    | Tipranavir(CID_54682461)     | 150.714              | ASP162, GLY68, MET161                                 |
|                    | Lopinavir (CID_92727)        | 148.381              | ASP162, GLY68, TRP26, HIS163, GLY23, GLY67            |
|                    | Saquinavir(CID_441243)       | 140.171              | GLY68, MET161                                         |
|                    | Darunavir(CID_213039)        | 137.975              | MET70, MET161                                         |
|                    | Amprenavir(CID_65016)        | 136.064              | GLY68, MET161, TRP26, GLY67                           |
| <b>Cathepsin L</b> | Nelfinavir(CID_64143)        | 134.429              | ASP162, CYS25, GLY68, TRP26, GLY67                    |
|                    | Fosamprenavir(CID_131536)    | 132.857              | ASP162, CYS25, GLY68, MET161, LEU69                   |
|                    | Simeprevir* (CID_24873435)   | 123.044              | ASP162, GLY68, MET161, GLY67                          |
|                    | Paritaprevir*( CID_45110509) | 118.679              | ASP162, MET161                                        |
|                    | Boceprevir * (CID_10324367)  | 109.652              | ASP162, GLY68                                         |
|                    | Asunaprevir*( CID_16076883)  | 101.922              | ASP162, CYS25, GLY68, HIS163                          |
|                    | Grazoprevir* (CID_44603531)  | No pose              | -                                                     |
|                    | Telaprevir*( CID_3010818)    | No pose              | -                                                     |

Molecular docking studies were done using LibDock protocol in Discovery studio 2020 and the pose having highest docking score corresponding to each ligand is documented for further analysis. Study revealed that Atazanavir showed highest docking score and favorable interactions with amino acid residues in defined active site. \* indicate HCV inhibitors.

Supplementary Table S5: Docking score and binding site residues of Cathepsin B against 16 protease inhibitors.

| Target             | Ligand                       | LibDock Score | Active site residues interacted through H-bond |
|--------------------|------------------------------|---------------|------------------------------------------------|
|                    | Indinavir (CID_5362440)      | 169.347       | GLY27, CYS29, HIS111, GLN23, GLY24, GLY198     |
|                    | Darunavir(CID_213039)        | 157.177       | GLY27, TRP221, GLY74, GLY73, GLY24             |
|                    | Amprenavir(CID_65016)        | 152.165       | GLY27, TRP221, GLY74, GLY73, GLY24             |
|                    | Fosamprenavir(CID_131536)    | 151.241       | GLY27, TRP221, GLY74, HIS199                   |
|                    | Tipranavir(CID_54682461)     | 151.187       | CYS29                                          |
|                    | Ritonavir (CID_392622)       | 150.161       | GLN23, GLY74                                   |
| <b>Cathepsin B</b> | Nelfinavir(CID_64143)        | 149.193       | HIS111, GLN23, CYS26                           |
|                    | Boceprevir * (CID_10324367)  | 137.083       | GLY27, TRP221, GLN23, GLY73, GLY198            |
|                    | Saquinavir(CID_441243)       | 134.155       | GLY27, GLY74                                   |
|                    | Lopinavir (CID_92727)        | 123.733       | CYS26                                          |
|                    | Atazanavir (CID_148192)      | 118.746       | GLY73                                          |
|                    | Grazoprevir* (CID_44603531)  | No pose       | -                                              |
|                    | Simeprevir* (CID_24873435)   | No pose       | -                                              |
|                    | Paritaprevir*( CID_45110509) | No pose       | -                                              |
|                    | Telaprevir*( CID_3010818)    | No pose       | -                                              |
|                    | Asunaprevir*( CID_16076883)  | No pose       | -                                              |

Molecular docking studies were done using LibDock protocol in Discovery studio 2020 and the pose having highest docking score corresponding to each ligand is documented for further analysis. Study revealed that Indinavir showed highest docking score and favorable interactions with amino acid residues in defined active site. \* indicate HCV inhibitors.
